# Supplementary material
Source: PubMed Central journal article supplement (PMC3023293)
Supplement: supp_00231.2010_tableS1.pdf [file supp_00231.2010_tableS1.pdf]

## Supplementary Table S1

| <u>Metabolite</u> | <u>Gene Symbol</u> | <u>EC Number</u>     | <u>Entrez Gene ID</u> | <u>Gene Description</u>                                        |
|-------------------|--------------------|----------------------|-----------------------|----------------------------------------------------------------|
| Adenosine         | ADA                | 3.5.4.4              | 100                   | adenosine deaminase                                            |
|                   | DCK                | 2.7.1.74             | 1633                  | deoxycytidine kinase                                           |
|                   | NP                 | 2.4.2.1;<br>3.4.17.1 | 4860                  | nucleoside phosphorylase                                       |
|                   | NT3                | 3.1.3.5              | 4877                  | 3'-nucleotidase                                                |
|                   | NT5C               | 3.1.3.5              | 30833                 | 5', 3'-nucleotidase, cytosolic                                 |
|                   | NT5C1A             | 3.1.3.5              | 84618                 | 5'-nucleotidase, cytosolic IA                                  |
|                   | NT5C1B             | 3.1.3.5              | 93034                 | 5'-nucleotidase, cytosolic IB                                  |
|                   | NT5C2              | 3.1.3.5              | 22978                 | 5'-nucleotidase, cytosolic II                                  |
|                   | NT5C3              | 3.1.3.5              | 51251                 | 5'-nucleotidase, cytosolic III                                 |
|                   | NT5E               | 3.1.3.5              | 4907                  | 5'-nucleotidase, ecto (CD73)                                   |
| Glutathione       | NT5M               | 3.1.3.5              | 56953                 | 5',3'-nucleotidase, mitochondrial                              |
|                   | GGT1               | 2.3.2.2              | 2678                  | gamma-glutamyltransferase 1                                    |
|                   | GGT2               | 2.3.2.2              | 728441                | gamma-glutamyltransferase 2                                    |
|                   | GGT3P              | 2.3.2.2              | 2679                  | gamma-glutamyltransferase 3                                    |
|                   | GGTL3              | 2.3.2.2              | 2686                  | gamma-glutamyltransferase-like 3                               |
|                   | GGTL4              | 2.3.2.2              | 91227                 | gamma-glutamyltransferase-like 4                               |
|                   | GGTLA1             | 2.3.2.2              | 2687                  | gamma-glutamyltransferase-like activity 1                      |
|                   | GPX1               | 1.11.1.9             | 2876                  | glutathione peroxidase 1                                       |
|                   | GPX2               | 1.11.1.9             | 2877                  | glutathione peroxidase 2 (gastrointestinal)                    |
|                   | GPX3               | 1.11.1.9             | 2878                  | glutathione peroxidase 3 (plasma)                              |
|                   | GPX4               | 1.11.1.12            |                       |                                                                |
|                   |                    | 1.11.1.9             | 2879                  | glutathione peroxidase 4 (phospholipid hydroperoxidase)        |
|                   | GPX5               | 1.11.1.9             | 2880                  | glutathione peroxidase 5 (epididymal androgen-related protein) |
|                   | GPX6               | 1.11.1.9             | 257202                | glutathione peroxidase 6 (olfactory)                           |
|                   | GPX7               | 1.11.1.9             | 2882                  | glutathione peroxidase 7                                       |
|                   | GSR                | 1.8.1.7              | 2936                  | glutathione reductase                                          |
|                   | GSS                | 6.3.2.3              | 2937                  | glutathione synthetase                                         |
|                   | GSTA1              | 2.5.1.18             | 2938                  | glutathione S-transferase A1                                   |

| <b>Metabolite</b>  | <b>Gene Symbol</b> | <b>EC Number</b>     | <b>Entrez Gene ID</b> | <b>Gene Description</b>                                       |
|--------------------|--------------------|----------------------|-----------------------|---------------------------------------------------------------|
| <b>Glutathione</b> | GSTA2              | 2.5.1.18             | 2939                  | glutathione S-transferase A2                                  |
|                    | GSTA3              | 2.5.1.18             | 2940                  | glutathione S-transferase A3                                  |
|                    | GSTA4              | 2.5.1.18             | 2941                  | glutathione S-transferase A4                                  |
|                    | GSTA5              | 2.5.1.18             | 221357                | glutathione S-transferase A5                                  |
|                    | GSTK1              | 2.5.1.18             | 373156                | glutathione S-transferase kappa 1                             |
|                    | GSTM1              | 2.5.1.18             | 2944                  | glutathione S-transferase M1                                  |
|                    | GSTM2              | 2.5.1.18             | 2946                  | glutathione S-transferase M2 (muscle)                         |
|                    | GSTM3              | 2.5.1.18             | 2947                  | glutathione S-transferase M3 (brain)                          |
|                    | GSTM4              | 2.5.1.18             | 2948                  | glutathione S-transferase M4                                  |
|                    | GSTM5              | 2.5.1.18             | 2949                  | glutathione S-transferase M5                                  |
|                    | GSTO1              | 2.5.1.18             | 9446                  | glutathione S-transferase omega 1                             |
|                    | GSTO2              | 2.5.1.18             | 119391                | glutathione S-transferase omega 2                             |
|                    | GSTP1              | 2.5.1.18             | 2950                  | glutathione S-transferase pi                                  |
|                    | GSTT1              | 2.5.1.18             | 2952                  | glutathione S-transferase theta 1                             |
|                    | GSTT2              | 2.5.1.18             | 2953                  | glutathione S-transferase theta 2                             |
|                    | GSTZ1              | 2.5.1.18;<br>5.2.1.2 | 2954                  | glutathione transferase zeta 1 (maleylacetoacetate isomerase) |
|                    | MGST1              | 2.5.1.18             | 4257                  | microsomal glutathione S-transferase 1                        |
|                    | MGST2              | 2.5.1.18             | 4258                  | microsomal glutathione S-transferase 2                        |
|                    | MGST3              | 2.5.1.18             | 4259                  | microsomal glutathione S-transferase 3                        |
|                    | <b>PtdSer</b>      | AASDHPPT             | 1.2.1.31;<br>2.7.8.-  | 60496                                                         |
| JMJD7-<br>PLA2G4B  |                    | 3.1.1.4              | 8681                  | JMJD7-PLA2G4B readthrough                                     |
| PISD               |                    | 4.1.1.65             | 23761                 | phosphatidylserine decarboxylase                              |
| PLA2G10            |                    | 3.1.1.4              | 8399                  | phospholipase A2, group X                                     |
| PLA2G12A           |                    | 3.1.1.4              | 81579                 | phospholipase A2, group XIIA                                  |
| PLA2G12B           |                    | 3.1.1.4              | 84647                 | phospholipase A2, group XIIB                                  |
| PLA2G1B            |                    | 3.1.1.4              | 5319                  | phospholipase A2, group IB (pancreas)                         |
| PLA2G2A            |                    | 3.1.1.4              | 5320                  | phospholipase A2, group IIA (platelets, synovial fluid)       |
| PLA2G2D            |                    | 3.1.1.4              | 26279                 | phospholipase A2, group IID                                   |

| <b>Metabolite</b> | <b>Gene Symbol</b>   | <b>EC Number</b>      | <b>Entrez Gene ID</b> | <b>Gene Description</b>                                                           |                                                    |
|-------------------|----------------------|-----------------------|-----------------------|-----------------------------------------------------------------------------------|----------------------------------------------------|
| <b>PtdSer</b>     | PLA2G2E              | 3.1.1.4               | 30814                 | phospholipase A2, group IIE                                                       |                                                    |
|                   | PLA2G2F              | 3.1.1.4               | 64600                 | phospholipase A2, group IIF                                                       |                                                    |
|                   | PLA2G3               | 3.1.1.4               | 50487                 | phospholipase A2, group III                                                       |                                                    |
|                   | PLA2G4A              | 3.1.1.4;<br>3.1.1.5   | 5321                  | phospholipase A2, group IVA (cytosolic, calcium-dependent)                        |                                                    |
|                   | PLA2G4C              | 3.1.1.4               | 8605                  | phospholipase A2, group IVC (cytosolic, calcium-independent)                      |                                                    |
|                   | PLA2G4D              | 3.1.1.4               | 283748                | phospholipase A2, group IVD (cytosolic)                                           |                                                    |
|                   | PLA2G4E              | 3.1.1.4               | 123745                | phospholipase A2, group IVE                                                       |                                                    |
|                   | PLA2G4F              | 3.1.1.4               | 255189                | phospholipase A2, group IVF                                                       |                                                    |
|                   | PLA2G5               | 3.1.1.4               | 5322                  | phospholipase A2, group V                                                         |                                                    |
|                   | PLA2G6               | 3.1.1.4               | 8398                  | phospholipase A2, group VI (cytosolic, calcium-independent)                       |                                                    |
|                   | PLD1                 | 3.1.4.4               | 5337                  | phospholipase D1, phosphatidylcholine-specific                                    |                                                    |
|                   | PLD2                 | 3.1.4.4               | 5338                  | phospholipase D2                                                                  |                                                    |
|                   | <b>Sphingomyelin</b> | ENPP7                 | 3.1.4.12              | 339221                                                                            | ectonucleotide pyrophosphatase/phosphodiesterase 7 |
|                   |                      | SGMS1                 | 2.7.8.27;<br>2.7.8.3  | 259230                                                                            | sphingomyelin synthase 1                           |
| SMPD1             |                      | 3.1.4.12;<br>3.1.4.41 | 6609                  | sphingomyelin phosphodiesterase 1, acid lysosomal                                 |                                                    |
| SMPD2             |                      | 3.1.4.12              | 6610                  | sphingomyelin phosphodiesterase 2, neutral membrane (neutral sphingomyelinase)    |                                                    |
| SMPD3             |                      | 3.1.4.12              | 55512                 | sphingomyelin phosphodiesterase 3, neutral membrane (neutral sphingomyelinase II) |                                                    |
| SMPD4             |                      | 3.1.4.12              | 55627                 | sphingomyelin phosphodiesterase 4, neutral membrane (neutral sphingomyelinase-3)  |                                                    |
